# Supplementary material for: Water assisted formation of highly oriented CsPbI2Br perovskite films with the solar cell efficiency exceeding 16%
Source: Royal Society of Chemistry journal article supplement (doi:10.1039/d0ta05118g), 2020-01-01
Supplement: d0ta05118g1.pdf [file d0ta05118g1.pdf]

## Supporting Information

### **Water Assisted Formation of Highly Oriented CsPbI<sub>2</sub>Br Perovskite Films with Solar Cell Efficiency Exceeding 16%**

Ze Qing Lin,<sup>a</sup> Hong Wei Qiao,<sup>a</sup> Zi Ren Zhou,<sup>a</sup> Yu Hou,<sup>a</sup> Xiaolong Li,<sup>b</sup> Hua Gui Yang,<sup>\*a</sup> and Shuang Yang<sup>\*a</sup>

*<sup>a</sup>Key Laboratory for Ultrafine Materials of Ministry of Education, School of Materials Science and Engineering, East China University of Science and Technology, Shanghai 200237, China*

*<sup>b</sup>Shanghai Synchrotron Radiation Facility, Shanghai Institute of Applied Physics, Chinese Academy of Sciences, Shanghai 201204, China*

**\*Corresponding authors:**

[hgyang@ecust.edu.cn](mailto:hgyang@ecust.edu.cn); [syang@ecust.edu.cn](mailto:syang@ecust.edu.cn)

## Experimental Section

### *Chemicals:*

Cesium iodide (CsI, 99.999%), lead iodide (PbI<sub>2</sub>, 99.9%), lead bromide (PbBr<sub>2</sub>, 99.9%), dimethyl sulfoxide (DMSO, 99.8%), isopropanol (IPA, anhydrous, >99.5%), titanium diisopropoxide bis(acetylacetonate) (75 wt% in isopropanol), bis(trifluoromethane)sulfonimide lithium salt (Li-TFSI, 99.95%), 4-tert-Butylpyridine (tBP, 96%) and chlorobenzene (CB, 99.9%) were purchased from Sigma-Aldrich. P3HT was purchased from Xi'an Polymer Light Technology Corp. Fluorine-doped tin oxide (FTO) substrates (8 Ω/sq) were purchased from Nippon Sheet Glass.

### *Device Fabrication:*

FTO substrates were ultrasonically cleaned by detergent solution, distilled H<sub>2</sub>O, alcohol, and acetone for 20 min respectively. After being dried by nitrogen flow, the FTO substrates were treated by an ultraviolet ozone cleaner for 15 min. TiO<sub>2</sub> precursor was prepared by dissolving 0.15 mol titanium diisopropoxide bis(acetylacetonate) in 1 mL ethanol. To obtain a compact TiO<sub>2</sub> layer, TiO<sub>2</sub> precursor was spin-coated on the substrate at 3000 rpm for 30 s, followed by thermal annealing at 500 °C for 30 min. The compact TiO<sub>2</sub> coated substrates were also treated by an ultraviolet ozone cleaner for 15 min before use. The H<sub>2</sub>O/IPA solutions were prepared by adding distilled H<sub>2</sub>O into IPA to the desired concentration. The perovskite precursor solution was prepared by dissolving 311.77 mg CsI, 276.61 mg PbI<sub>2</sub>, 220.20 mg PbBr<sub>2</sub> in 1 mL DMSO, followed by stirring at 50 °C overnight in a nitrogen-filled glove box. The as-prepared CsPbI<sub>2</sub>Br precursor was filtered by a 0.2 μm polytetrafluoroethylene filter to get the clear solution before use. Subsequently, 35 μL perovskite precursor were loaded onto the compact TiO<sub>2</sub> substrate and spin-coated via a three-step process, the first step is 500 rpm for 20 s, the second step is 3000 rpm for 30 s, and the third step is 6000 rpm for 15s, respectively. At about 55s during spin-coating, the IPA solution with different amount of H<sub>2</sub>O was dropped

on the precursor films. Then, the films were transferred to the hotplate in 3 seconds and annealed immediately at 300 °C for 10 min in glove box. After cooling down to room temperature, P3HT transport layer was deposited by spin-coating at 4000 rpm for 30s and annealed on a hot plate at 120 °C for 10 min. A total of 1 mL of P3HT in CB solution contained 15 mg P3HT with the addition of 11.2  $\mu$ L tBP and 54  $\mu$ L Li-TFSI in acetonitrile (10 mg/mL). Finally, 100 nm Au was thermally deposited onto the transport layer under vacuum as the back contact.

*Characterization:*

Field emission scanning electron microscopy (FESEM, HITACHI S4800) and atomic force microscopy (AFM, Veeco/DI) were used to characterize the morphology and roughness of the CsPbI<sub>2</sub>Br films. X-ray diffraction (XRD) patterns were recorded with an X-ray diffractometer Bruker D8 Advance operated Cu K $\alpha$  radiation. UV-vis spectra were collected using a Cary 500 UC-Vis-NIR spectrophotometer. Photoluminescence (PL) spectra was acquired at room temperature by exciting the samples deposited onto a non-conducting glass with the Fluorolog-3-p spectrophotometer under the excitation wavelength of 380 nm. Time-resolved PL experiments were performed by exciting the samples deposited onto glass substrates using the second harmonic of a picosecond mode-locked Ti-sapphire laser (80.5 MHz) at 420 nm under ambient conditions. Grazing incidence wide-angle X-ray scattering (GIWAXS) measurements were performed at the BL14B1 beamline of the Shanghai Synchrotron Radiation Facility with a grazing incidence angle of 0.2°. Both the surface and cross-section morphology measurements were performed with Hitachi S-4800 field-emission electron microscope. X-ray photoelectron spectroscopy (XPS, PHI5300, Mg anode, 250 W, 14 kV) was used to analyze the chemical states of the CsPbI<sub>2</sub>Br precursor films, and the binding energy of the C 1s peak at 284.8 eV was taken as an internal reference. Ultraviolet photoelectron spectroscopy (UPS) spectra was recorded with He source of incident energy of 21.22 eV (He I

line) in Ningbo Institute of Industrial Technology, CAS, Ningbo. The Current density-Voltage (J-V) curves of the photovoltaic devices were measured using a Keithley 2400 digital sourcemeter with a scan rate of  $0.15 \text{ V s}^{-1}$  under a simulated AM 1.5G spectrum and a solar simulator (Solar IV-150A, Zolix). Before each measurement, light intensity was calibrated with a standard Newport calibrated KG5-filtered Si reference cell. The external quantum efficiency (EQE) spectra was measured by a Newport-74125 system, calibrated by Si reference solar cell. The steady state photocurrent output of the best-performing devices was measured by biasing the device at maxing power point by a Keithley 2400 digital sourcemeter. Devices were masked with a metal aperture to define the active area of  $0.0625 \text{ cm}^2$ .

## Supporting Figures and Tables

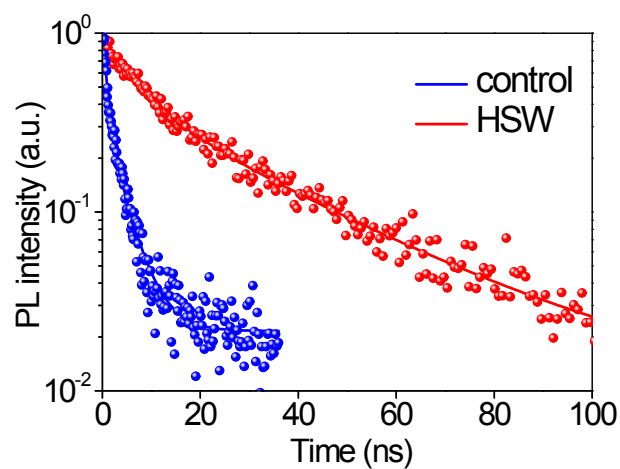

**Figure S1.** Time-resolved photoluminescence spectra (TRPL) decay curves of the CsPbI<sub>2</sub>Br films on glass with and without HSW treatment. Isopropanol with 1.5 vol% of H<sub>2</sub>O was used as the washing solvent.

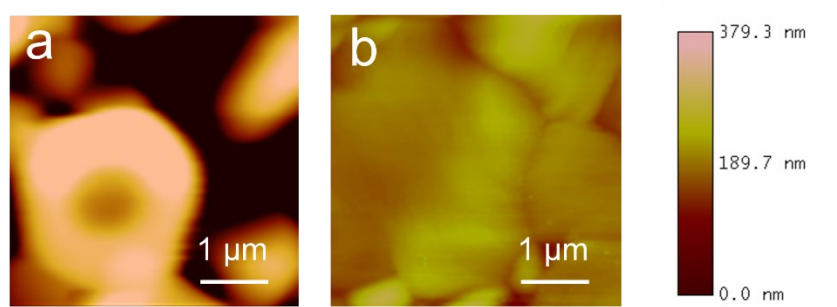

**Figure S2.** AFM images of CsPbI<sub>2</sub>Br films obtained via (a) control and (b) HSW methods.

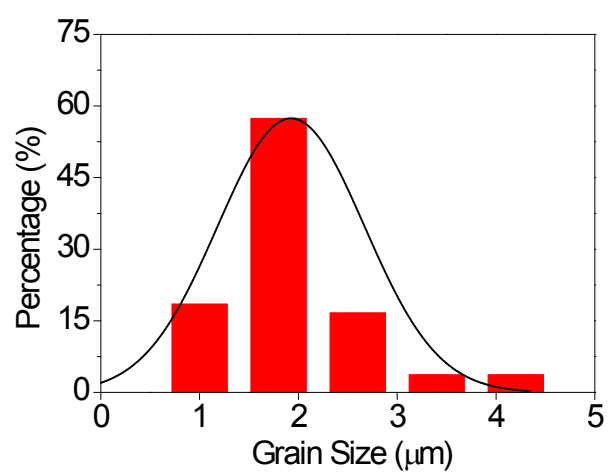

**Figure S3.** Statistical distribution of grain size for the CsPbI<sub>2</sub>Br film prepared with HSW method. Isopropanol with 1.5 vol% of H<sub>2</sub>O was used as the washing solvent.

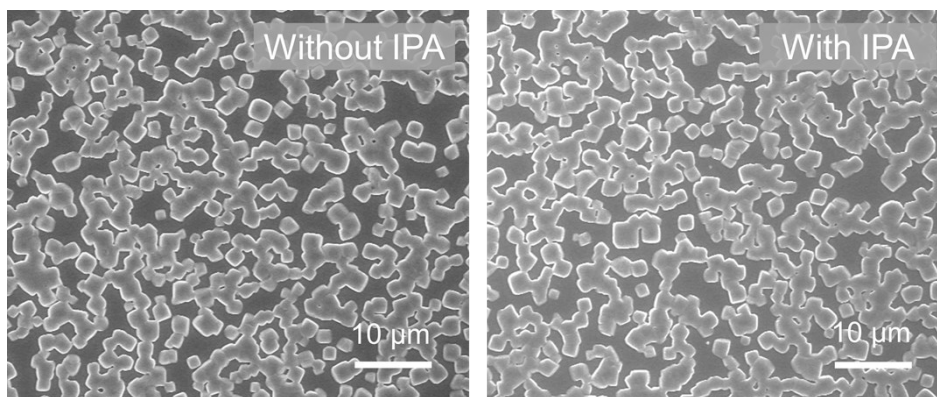

**Figure S4.** SEM image of CsPbI<sub>2</sub>Br films prepared by one-step spin-coating with and without IPA washing.



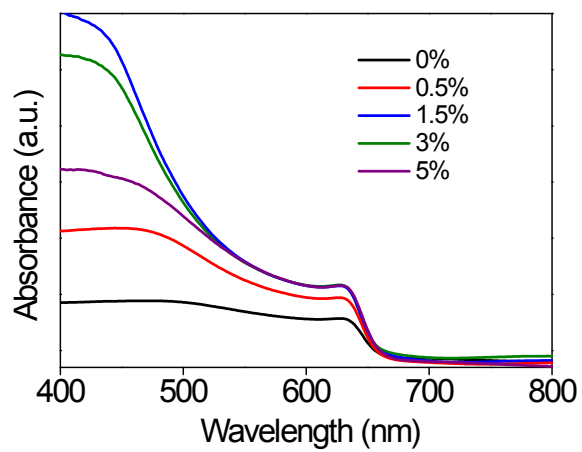

**Figure S5.** UV-vis absorption spectra of the CsPbI<sub>2</sub>Br films prepared by HSW method with different concentrations of H<sub>2</sub>O.

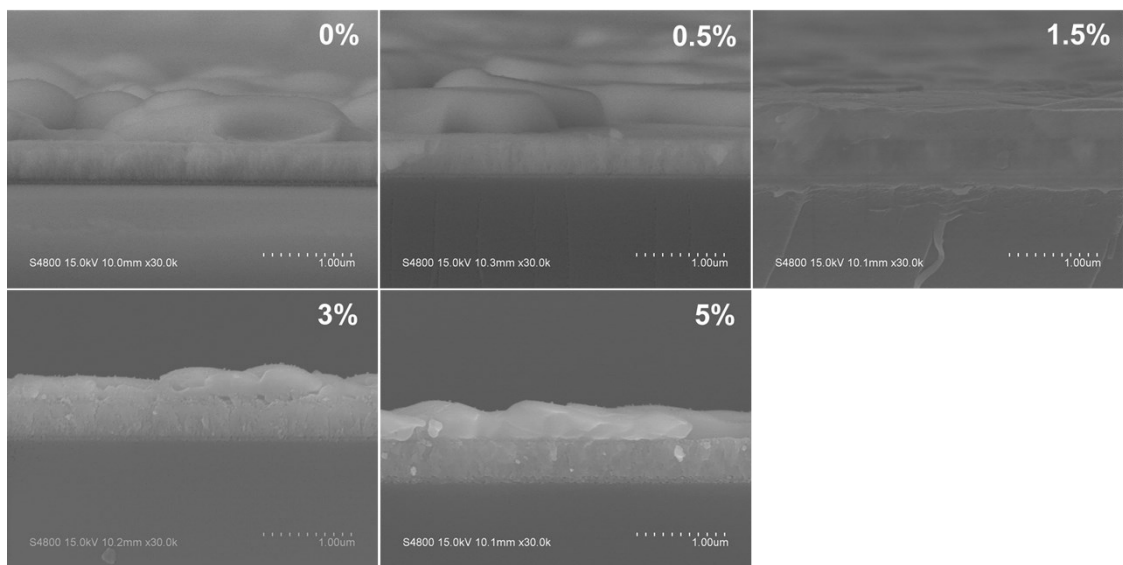

**Figure S6.** Cross-sectional SEM images of CsPbI<sub>2</sub>Br films prepared by HSW method with different concentrations of H<sub>2</sub>O.

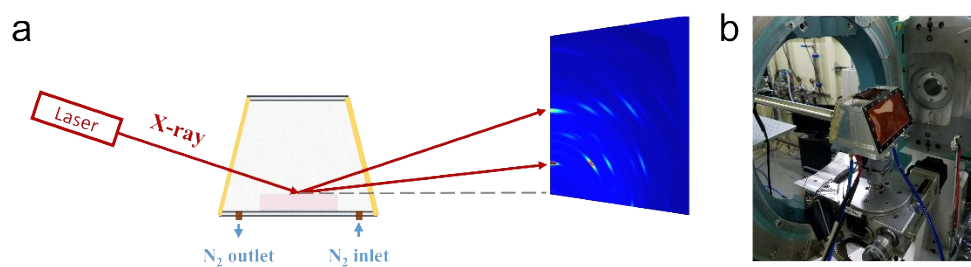

**Figure S7.** (a) Schematic and (b) photograph of the experimental setup for GIWAXS characterization.

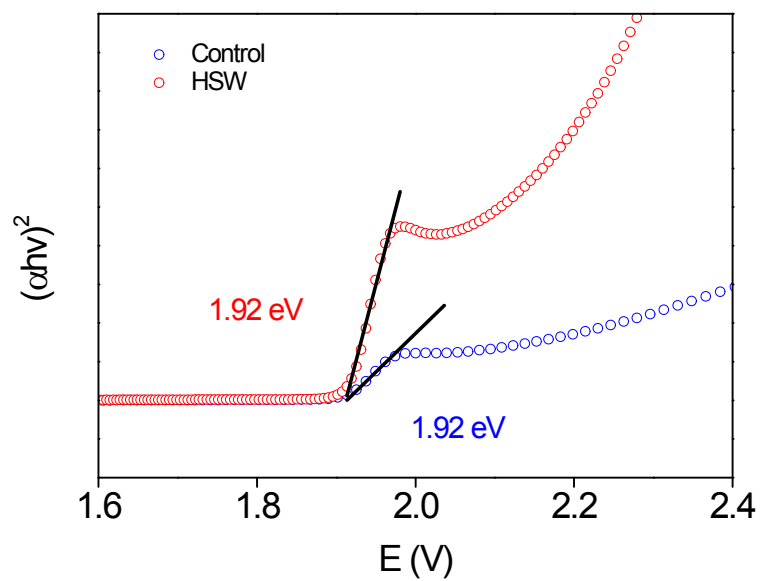

**Figure S8.** Tauc plots of control (blue) and HSW (red) CsPbI<sub>2</sub>Br films.

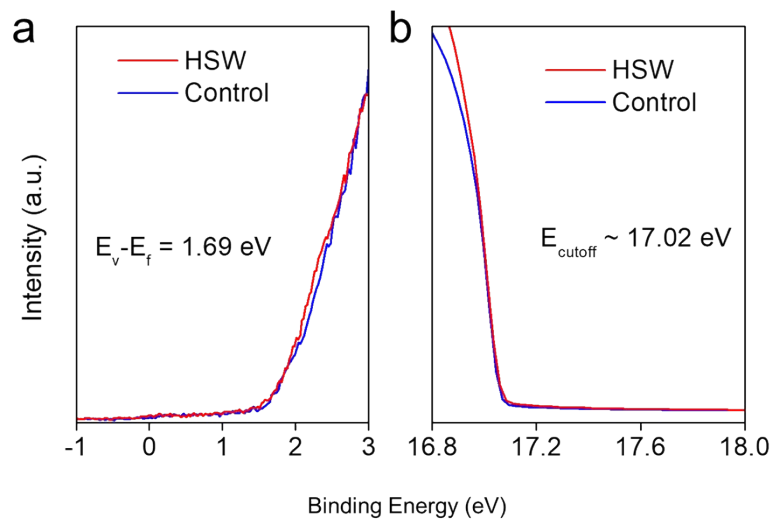

**Figure S9.** (a) Valence band edge and (b) secondary electron cutoff edge of the control and HSW CsPbI<sub>2</sub>Br films.

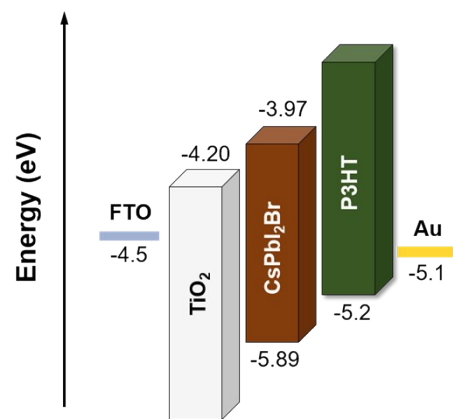

**Figure S10.** Energy band diagram of the as-prepared PSCs by using HSW CsPbI<sub>2</sub>Br perovskite layer.

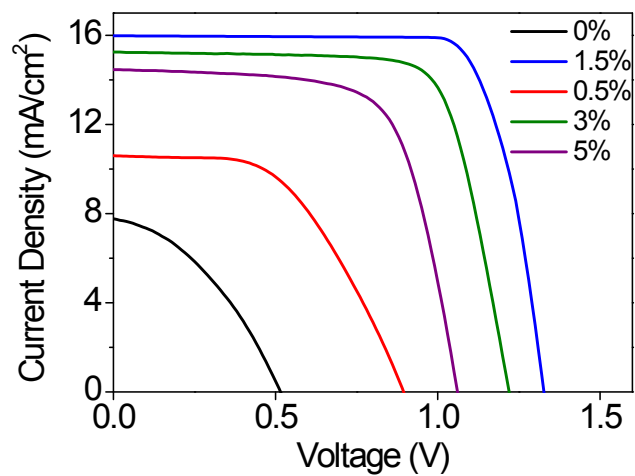

**Figure S11.** J-V curves of the champion devices fabricated by HSW method with different concentration of H<sub>2</sub>O.

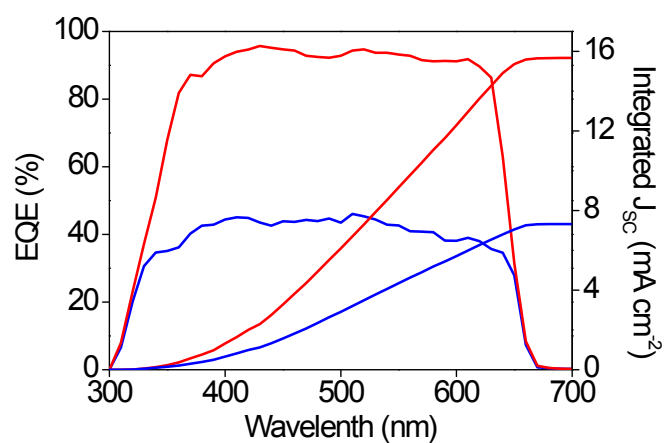

**Figure S12.** EQE spectra and integrated short-circuit current density of the control device (blue) and the HSW device (red).



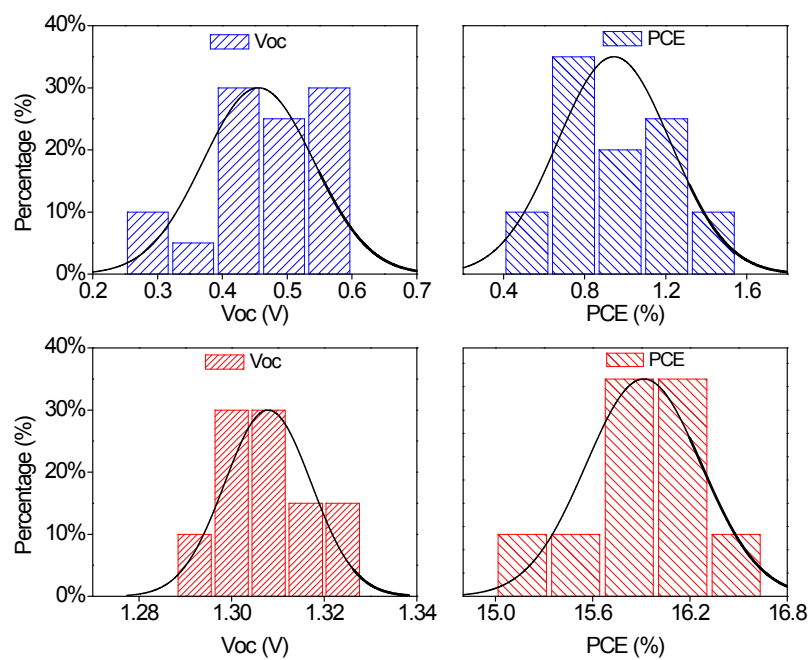

**Figure S13.** Statistics of  $V_{oc}$  and PCE distribution from 20 individual control (blue) and HSW (red) PSC devices.

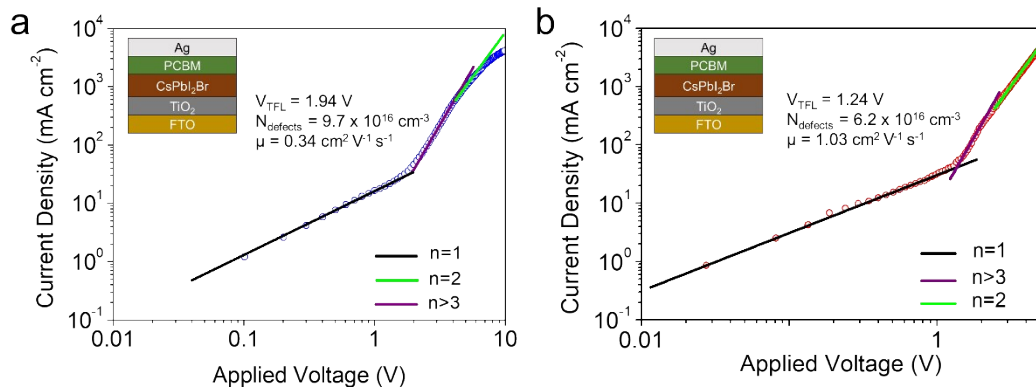

**Figure S14.** SCLC measurements of electron-only devices of (a) control and (b) HSW CsPbI<sub>2</sub>Br film. Inset is the device structure for SCLC test.

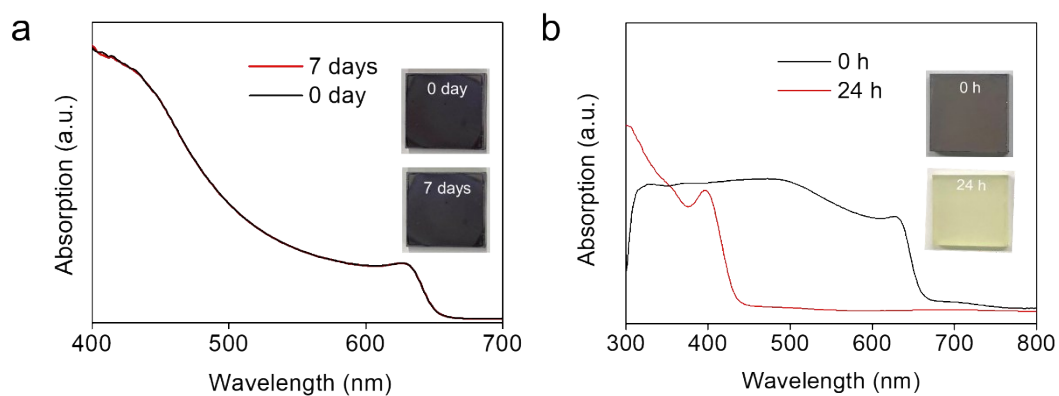

**Figure S15.** (a) UV-vis spectra of HSW CsPbI<sub>2</sub>Br films after exposure to dry air for 7 days. The relative humidity is  $15 \pm 3\%$ . (b) UV-vis spectra of the control CsPbI<sub>2</sub>Br films after exposure to dry air for 24 h. Insets are photographs of corresponding films.

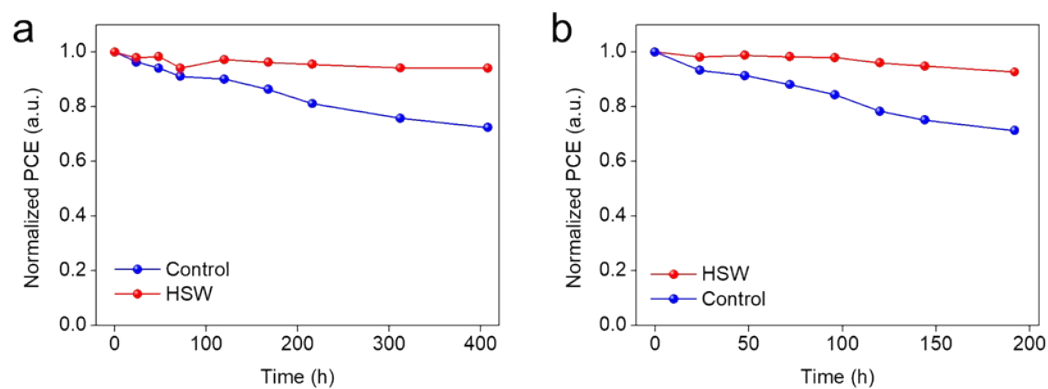

**Figure S16.** (a) Operational stability measurements of control and HSW CsPbI<sub>2</sub>Br devices under continuous one-sun illumination (100 mWcm<sup>-2</sup>) in N<sub>2</sub>-filled glovebox. (b) Thermal stability measurements of control and HSW CsPbI<sub>2</sub>Br devices heated to 85 °C in N<sub>2</sub>-filled glovebox.

**Table S1.** Carrier lifetimes of CsPbI<sub>2</sub>Br films obtained by fitting TRPL spectra.

| <b>Samples</b> | <b><math>\tau_1</math> (ns)</b> | <b><math>\tau_2</math> (ns)</b> |
|----------------|---------------------------------|---------------------------------|
| Control        | 0.86                            | 3.74                            |
| HSW            | 6.73                            | 30.05                           |

**Table S2.** Photovoltaic parameters of champion CsPbI<sub>2</sub>Br solar cells prepared with different concentration of H<sub>2</sub>O.

| <b>H<sub>2</sub>O/IPA</b> | <b>J<sub>sc</sub><br/>(mA cm<sup>-2</sup>)</b> | <b>V<sub>oc</sub><br/>(V)</b> | <b>FF</b> | <b>PCE<br/>(%)</b> |
|---------------------------|------------------------------------------------|-------------------------------|-----------|--------------------|
| 0%                        | 7.77                                           | 0.52                          | 0.38      | 1.52%              |
| 0.5%                      | 10.60                                          | 0.90                          | 0.52      | 4.94%              |
| 1.5%                      | 15.98                                          | 1.33                          | 0.78      | 16.47%             |
| 3%                        | 15.25                                          | 1.22                          | 0.74      | 13.77%             |
| 5%                        | 14.46                                          | 1.06                          | 0.68      | 10.47%             |

**Table S3.** Photovoltaic parameters of champion HSW CsPbI<sub>2</sub>Br solar cell with different scan directions.

|         | <b>J<sub>sc</sub></b><br><b>(mA cm<sup>-2</sup>)</b> | <b>V<sub>oc</sub></b><br><b>(V)</b> | <b>FF</b> | <b>PCE</b><br><b>(%)</b> |
|---------|------------------------------------------------------|-------------------------------------|-----------|--------------------------|
| Reverse | 15.98                                                | 1.33                                | 0.78      | 16.47%                   |
| Forward | 15.86                                                | 1.31                                | 0.77      | 16.15%                   |

**Table S4.** Comparison of the photovoltaic parameters of some reported CsPbI<sub>2</sub>Br solar cells.

| <b>J<sub>sc</sub></b><br><b>(mA cm<sup>-2</sup>)</b> | <b>V<sub>oc</sub></b><br><b>(V)</b> | <b>FF</b> | <b>PCE</b><br><b>(%)</b> | <b>Ref</b> |
|------------------------------------------------------|-------------------------------------|-----------|--------------------------|------------|
| 15.98                                                | 1.33                                | 0.78      | 16.47                    | This work  |
| 16.95                                                | 1.18                                | 0.80      | 16.15                    | 1          |
| 16.82                                                | 1.15                                | 0.75      | 14.69                    | 2          |
| 15.8                                                 | 1.18                                | 0.72      | 13.6                     | 3          |
| 15.45                                                | 1.21                                | 0.79      | 14.85                    | 4          |
| 15.86                                                | 1.32                                | 0.75      | 15.50                    | 5          |
| 15.28                                                | 1.30                                | 0.78      | 15.56                    | 6          |
| 15.1                                                 | 1.15                                | 0.78      | 13.57                    | 7          |
| 14.65                                                | 1.22                                | 0.81      | 14.65                    | 8          |
| 15.3                                                 | 1.30                                | 0.81      | 16.2                     | 9          |



## Reference

1. K. L. Wang, R. Wang, Z. K. Wang, M. Li, Y. Zhang, H. Ma, L. S. Liao and Y. Yang, *Nano Lett.*, 2019, **19**, 5176-5184.
2. Y. Fan, J. Fang, X. Chang, M.-C. Tang, D. Barrit, Z. Xu, Z. Jiang, J. Wen, H. Zhao, T. Niu, D.-M. Smilgies, S. Jin, Z. Liu, E. Q. Li, A. Amassian, S. Liu and K. Zhao, *Joule*, 2019, **3**, 2485-2502.
3. H. Sun, J. Zhang, X. Gan, L. Yu, H. Yuan, M. Shang, C. Lu, D. Hou, Z. Hu, Y. Zhu and L. Han, *Adv. Energy Mater.*, 2019, **9**, 1900896.
4. S. S. Mali, J. V. Patil and C. K. Hong, *Nano Lett.*, 2019, **19**, 6213-6220.
5. W. Xu, F. He, M. Zhang, P. Nie, S. Zhang, C. Zhao, R. Luo, J. Li, X. Zhang, S. Zhao, W.-D. Li, F. Kang, C.-W. Nan and G. Wei, *ACS Energy Lett.*, 2019, **4**, 2491-2499.
6. H. Zhao, Y. Han, Z. Xu, C. Duan, S. Yang, S. Yuan, Z. Yang, Z. Liu and S. Liu, *Adv. Energy Mater.*, 2019, **9**, 1902279.
7. C. Liu, W. Li, H. Li, H. Wang, C. Zhang, Y. Yang, X. Gao, Q. Xue, H.-L. Yip, J. Fan, R. E. I. Schropp and Y. Mai, *Adv. Energy Mater.*, 2019, **9**, 1803572.
8. X. Liu, Y. Xiao, Q. Zeng, J. Jiang and Y. Li, *J. Phys. Chem. Lett.*, 2019, **10**, 6382-6388.
9. J. Tian, Q. Xue, X. Tang, Y. Chen, N. Li, Z. Hu, T. Shi, X. Wang, F. Huang, C. J. Brabec, H. L. Yip and Y. Cao, *Adv. Mater.*, 2019, **31**, e1901152.
